# Supplementary material for: Ten-year change in sedentary behaviour, moderate-to-vigorous physical activity, cardiorespiratory fitness and cardiometabolic risk: independent associations and mediation analysis
Source: PubMed Central journal article supplement (PMC6089204; doi:10.1136/bjsports-2016-096083), 2016-08-04
Supplement: bjsports-2016-096083supp001.pdf [file bjsports-2016-096083supp001.pdf]

## Model 1

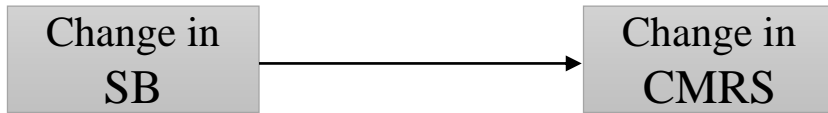

Adjusted for: age, follow-up time, sex, original study population; baseline and change in healthy eating, smoking, education level; baseline SB

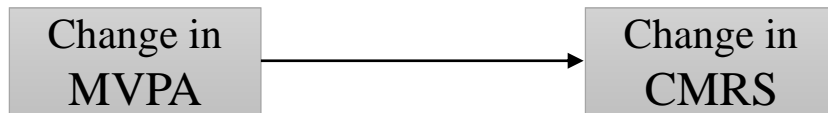

Adjusted for: age, follow-up time, sex, original study population; baseline and change in healthy eating, smoking, education level; baseline MVPA

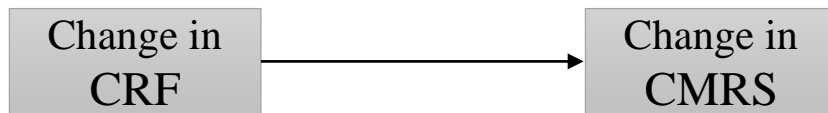

Adjusted for: age, follow-up time, sex, original study population; baseline and change in healthy eating, smoking, education level; baseline CRF

## Model 2

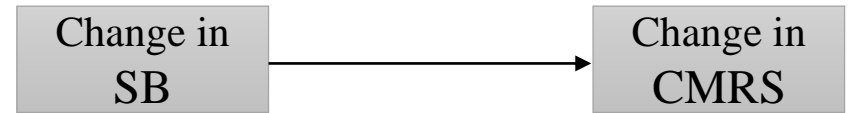

Adjusted for: age, follow-up time, sex, original study population; baseline and change in healthy eating, smoking, education level; baseline SB, **baseline and change in MVPA**

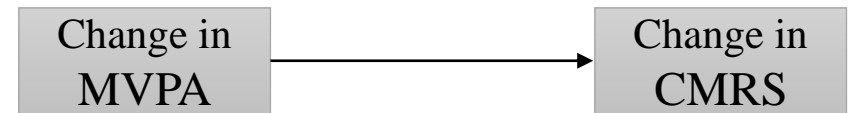

Adjusted for: age, follow-up time, sex, original study population; baseline and changes in healthy eating, smoking, education level; baseline MVPA, **baseline and change in SB**

*Note.* SB = Sedentary Behavior; MVPA = moderate-to-vigorous physical activity; CRF=Cardiorespiratory fitness, CMRS = Cardio-metabolic risk score
