# Supplementary material for: Ten-year change in sedentary behaviour, moderate-to-vigorous physical activity, cardiorespiratory fitness and cardiometabolic risk: independent associations and mediation analysis
Source: PubMed Central journal article supplement (PMC6089204; doi:10.1136/bjsports-2016-096083), 2016-08-04
Supplement: bjsports-2016-096083supp002.pdf [file bjsports-2016-096083supp002.pdf]

**Supplement 1. Regression coefficients of sedentary behavior, moderate-to-vigorous physical activity and cardiorespiratory fitness for clustered cardio-metabolic health and cardio-metabolic markers**

| <i>Change in</i>                | Model | Change in SB       |              | Change in MVPA     |               | Change in CRF      |               |
|---------------------------------|-------|--------------------|--------------|--------------------|---------------|--------------------|---------------|
|                                 |       |                    | 95% CI       |                    | 95% CI        |                    | 95% CI        |
| CMRS                            | 1     | 0.01 <sup>c</sup>  | 0.01 , 0.02  | -0.02 <sup>c</sup> | -0.03 , -0.01 | -0.03 <sup>c</sup> | -0.04 , -0.02 |
|                                 | 2     | 0.01 <sup>c</sup>  | 0.01 , 0.02  | -0.02 <sup>c</sup> | -0.03 , -0.01 |                    |               |
| CMRS <sub>no-adip</sub>         | 1     | 0.01 <sup>c</sup>  | 0.01 , 0.02  | -0.02 <sup>c</sup> | -0.03 , -0.01 | -0.03 <sup>c</sup> | -0.04 , -0.02 |
|                                 | 2     | 0.01 <sup>c</sup>  | 0.01 , 0.02  | -0.02 <sup>c</sup> | -0.03 , -0.01 |                    |               |
| Waist Circumference (cm)        | 1     | 0.07 <sup>b</sup>  | 0.02 , 0.13  | -0.12 <sup>a</sup> | -0.22 , -0.01 | -0.34 <sup>c</sup> | -0.42 , -0.26 |
|                                 | 2     | 0.08 <sup>a</sup>  | 0.02 , 0.13  | -0.12 <sup>a</sup> | -0.23 , -0.01 |                    |               |
| Fasting Glucose (mmol/L)        | 1     | 0.00               | -0.01 , 0.01 | -0.01 <sup>a</sup> | -0.02 , 0.00  | -0.01 <sup>b</sup> | -0.02 , 0.00  |
|                                 | 2     | 0.00               | -0.01 , 0.01 | -0.01 <sup>a</sup> | -0.02 , 0.00  |                    |               |
| HDL-cholesterol (mmol/L)        | 1     | -0.01 <sup>c</sup> | -0.01 , 0.00 | 0.01 <sup>b</sup>  | 0.00 , 0.01   | 0.01 <sup>c</sup>  | 0.01 , 0.02   |
|                                 | 2     | -0.01 <sup>c</sup> | -0.01 , 0.00 | 0.01 <sup>b</sup>  | 0.00 , 0.01   |                    |               |
| Triglycerides (mmol/L)          | 1     | 0.01 <sup>c</sup>  | 0.01 , 0.02  | -0.01              | -0.02 , 0.00  | -0.02 <sup>c</sup> | -0.03 , -0.01 |
|                                 | 2     | 0.01 <sup>c</sup>  | 0.01 , 0.02  | -0.01              | -0.02 , 0.00  |                    |               |
| Diastolic Blood Pressure (mmHg) | 1     | 0.14 <sup>b</sup>  | 0.04 , 0.24  | -0.17              | -0.37 , 0.02  | -0.35 <sup>c</sup> | -0.50 , -0.21 |
|                                 | 2     | 0.14 <sup>b</sup>  | 0.03 , 0.24  | -0.18              | -0.37 , 0.01  |                    |               |
| Systolic Blood Pressure (mmHg)  | 1     | 0.16               | -0.01 , 0.32 | 0.02               | -0.29 , 0.34  | -0.35 <sup>b</sup> | -0.57 , -0.13 |
|                                 | 2     | 0.15               | -0.02 , 0.32 | 0.02               | -0.30 , 0.33  |                    |               |

Legend Supplement 1

SB = Sedentary Behavior; MVPA = moderate-to-vigorous physical activity; CRF=Cardiorespiratory fitness

Model 1: adjusted for age, follow-up time, sex, original study population; baseline and changes in healthy eating, smoking, education level; baseline of the relevant exposure and outcome (SB & MVPA n=524; CRF n=399)

Model 2: adjusted for all covariates in model 1 adjusted for changes and baseline MVPA for SB and vice versa (n=524)

<sup>a</sup> p<0.05; <sup>b</sup> p<0.01 <sup>c</sup> p<0.001
