# Supplementary material for: Ten-year change in sedentary behaviour, moderate-to-vigorous physical activity, cardiorespiratory fitness and cardiometabolic risk: independent associations and mediation analysis
Source: PubMed Central journal article supplement (PMC6089204; doi:10.1136/bjsports-2016-096083), 2016-08-04
Supplement: bjsports-2016-096083supp003.pdf [file bjsports-2016-096083supp003.pdf]

**Supplement 2. Standardized regression coefficients of sedentary behavior, moderate-to-vigorous physical activity and cardiorespiratory fitness for clustered cardio-metabolic health and cardio-metabolic markers in a subgroup with complete data**

| <i>Change in</i>         | Model | Change in SB       |               | Change in MVPA     |               | Change in CRF      |               |
|--------------------------|-------|--------------------|---------------|--------------------|---------------|--------------------|---------------|
|                          |       |                    | 95% CI        |                    | 95% CI        |                    | 95% CI        |
| CMRS                     | 1     | 0.19 <sup>c</sup>  | 0.08 , 0.29   | -0.21 <sup>c</sup> | -0.32 , -0.10 | -0.40 <sup>c</sup> | -0.49 , -0.30 |
|                          | 2     | 0.18 <sup>c</sup>  | 0.08 , 0.29   | -0.21 <sup>c</sup> | -0.32 , -0.10 |                    |               |
| CMRS <sub>no-adip</sub>  | 1     | 0.18 <sup>c</sup>  | 0.07 , 0.28   | -0.20 <sup>c</sup> | -0.31 , -0.09 | -0.34 <sup>c</sup> | -0.43 , -0.24 |
|                          | 2     | 0.17 <sup>c</sup>  | 0.07 , 0.28   | -0.20 <sup>c</sup> | -0.31 , -0.09 |                    |               |
| Waist Circumference      | 1     | 0.11 <sup>a</sup>  | 0.01 , 0.22   | -0.15 <sup>a</sup> | -0.26 , -0.03 | -0.40 <sup>c</sup> | -0.50 , -0.31 |
|                          | 2     | 0.11 <sup>a</sup>  | 0.01 , 0.22   | -0.15 <sup>a</sup> | -0.26 , -0.03 |                    |               |
| Fasting Glucose          | 1     | 0.04               | -0.06 , 0.15  | -0.05              | -0.16 , 0.06  | -0.13 <sup>b</sup> | -0.23 , -0.03 |
|                          | 2     | 0.04               | -0.06 , 0.15  | -0.05              | -0.16 , 0.07  |                    |               |
| HDL-cholesterol          | 1     | -0.12 <sup>a</sup> | -0.22 , -0.02 | 0.22 <sup>c</sup>  | 0.11 , 0.32   | 0.23 <sup>c</sup>  | 0.14 , 0.33   |
|                          | 2     | -0.12 <sup>a</sup> | -0.22 , -0.02 | 0.21 <sup>c</sup>  | 0.10 , 0.32   |                    |               |
| Triglycerides            | 1     | 0.14 <sup>b</sup>  | 0.04 , 0.24   | -0.09              | -0.20 , 0.01  | -0.21 <sup>c</sup> | -0.31 , -0.11 |
|                          | 2     | 0.14 <sup>b</sup>  | 0.04 , 0.24   | -0.09              | -0.20 , 0.01  |                    |               |
| Diastolic Blood Pressure | 1     | 0.10 <sup>a</sup>  | 0.00 , 0.20   | -0.14 <sup>a</sup> | -0.25 , -0.03 | -0.22 <sup>c</sup> | -0.31 , -0.13 |
|                          | 2     | 0.11 <sup>a</sup>  | 0.01 , 0.21   | -0.14 <sup>a</sup> | -0.24 , -0.03 |                    |               |
| Systolic Blood Pressure  | 1     | 0.08               | -0.02 , 0.18  | -0.06              | -0.17 , 0.04  | -0.14 <sup>b</sup> | -0.22 , -0.05 |
|                          | 2     | 0.09               | -0.01 , 0.19  | -0.06              | -0.17 , 0.04  |                    |               |

Legend Supplement 2

Data are standardized regression coefficients

SB = Sedentary Behavior; MVPA = moderate-to-vigorous physical activity; CRF=Cardiorespiratory fitness

Model 1: adjusted for age, follow-up time, sex, original study population; baseline and changes in healthy eating, smoking, education level; baseline of the relevant exposure and outcome (SB, MVPA & CRF n=399)

Model 2: adjusted for all covariates in model 1 adjusted for changes and baseline MVPA for SB and vice versa;

<sup>a</sup> p<0.05; <sup>b</sup> p<0.01; <sup>c</sup> p<0.001
